# Supplementary material for: Lanthanide(iii) complexes of monophosphinate/monophosphonate DOTA-analogues: effects of the substituents on the formation rate and radiolabelling yield
Source: Royal Society of Chemistry journal article supplement (doi:10.1039/c8dt02608d), 2018-01-01
Supplement: C8DT02608D1.pdf [file C8DT02608D1.pdf]

## Supplementary information

# Lanthanide(III) complexes of monophosphinate/monophosphonate DOTA-analogues: effect of the substituents on formation rate and radiolabelling yield

Soňa Procházková,<sup>a</sup> Vojtěch Kubíček,<sup>a\*</sup> Jan Kotek,<sup>a</sup> Adrienn Vágner,<sup>b</sup> Johannes Notni<sup>b</sup> and Petr Hermann<sup>a</sup>

<sup>a</sup> Department of Inorganic Chemistry, Faculty of Science, Charles University, Hlavova 2030, 128 43 Prague 2, Czech Republic; email: [kubicek@natur.cuni.cz](mailto:kubicek@natur.cuni.cz); tel.: +420 221951436; fax: +420 221951253.

<sup>b</sup> Lehrstuhl für Pharmazeutische Radiochemie, Technische Universität München, Walther-Meissner-Strasse 3, D-85748 Garching, Germany.

## Table of content

|                                                                                                                                                                                                                             |    |
|-----------------------------------------------------------------------------------------------------------------------------------------------------------------------------------------------------------------------------|----|
| Figure S1. 2D coordination polymer motive found in the solid-state structure of Na[Eu(do3aP <sup>H</sup> )(H <sub>2</sub> O)]·2NaCl·7.125H <sub>2</sub> O .....                                                             | 2  |
| Figure S2. Crystal packing of Na[Eu(do3aP <sup>H</sup> )(H <sub>2</sub> O)]·2NaCl·7.125H <sub>2</sub> O .....                                                                                                               | 3  |
| Isolation and structure of DO3A lactame – H <sub>2</sub> do3a <sup>lac</sup> .....                                                                                                                                          | 4  |
| Figure S3. Molecular structure of (H <sub>4</sub> do3a <sup>lac</sup> ) <sup>2+</sup> cation found in the crystal structure of (H <sub>4</sub> do3a <sup>lac</sup> )Cl <sub>2</sub> ·2H <sub>2</sub> O .....                | 4  |
| Table S1. Experimental data of the reported crystal structures .....                                                                                                                                                        | 5  |
| Table S2. Overall protonation constants logβ of ligands .....                                                                                                                                                               | 6  |
| Figure S4. Representative absorption spectra: Ce <sup>III</sup> aqua ion, <i>out-of-cage</i> and <i>in-cage</i> Ce <sup>III</sup> -do3aP <sup>PIN</sup> complex .....                                                       | 7  |
| Figure S5. Representative absorption spectra of Ce <sup>III</sup> -H <sub>4</sub> do3aP <sup>H</sup> and Ce <sup>III</sup> -H <sub>5</sub> do3aP <sup>PIN</sup> systems measured immediately after mixing at various .....  | 7  |
| Figure S6. Formation of <i>out-of-cage</i> complexes: pH dependence of absorbance measured immediately after mixing of the components .....                                                                                 | 8  |
| Figure S7. Changes of absorption spectra in the course of complexation of H <sub>5</sub> do3aP <sup>PIN</sup> and H <sub>4</sub> do3aP <sup>AM</sup> and time dependences of absorbance of the <i>in-cage</i> complex ..... | 9  |
| Figure S8. pH dependence of the formation rate constants under the Ce <sup>III</sup> excess and under the ligand excess .....                                                                                               | 10 |

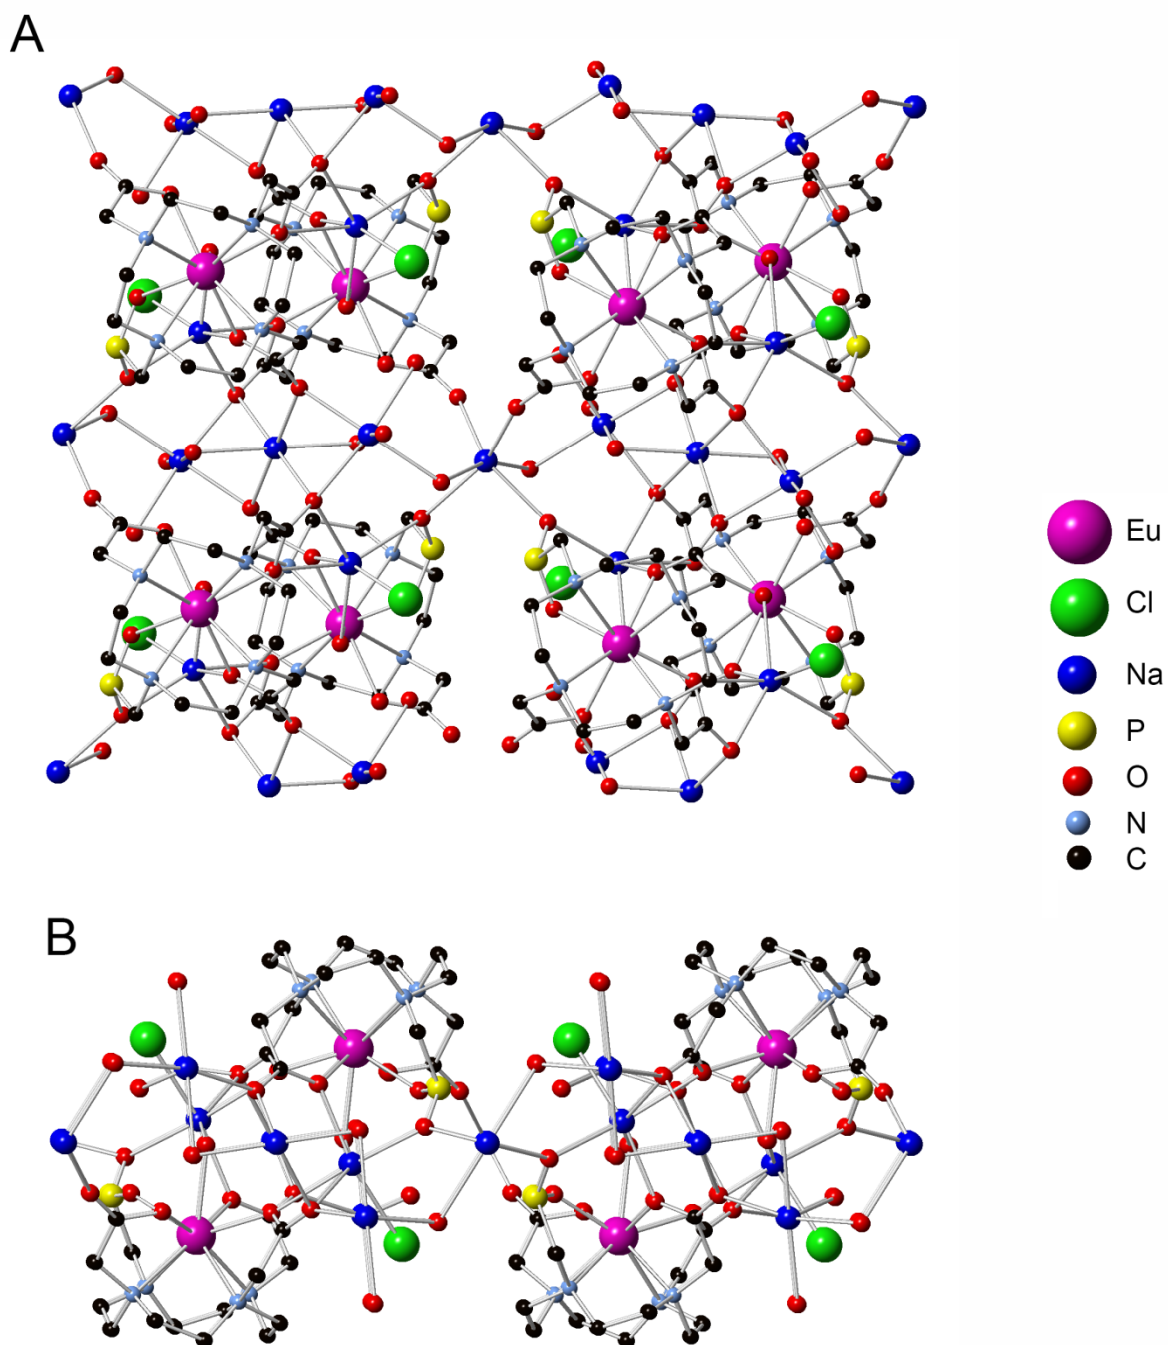

Figure S1. 2D coordination polymer motive found in the solid-state structure of  $\text{Na}[\text{Eu}(\text{do3aP}^{\text{H}})(\text{H}_2\text{O})] \cdot 2\text{NaCl} \cdot 7.125\text{H}_2\text{O}$ . The view perpendicular to  $\text{O}_4/\text{N}_4$ -planes of the coordination spheres (**A**) and the view along the  $y$ -axis (**B**). Hydrogen atoms are omitted for clarity.

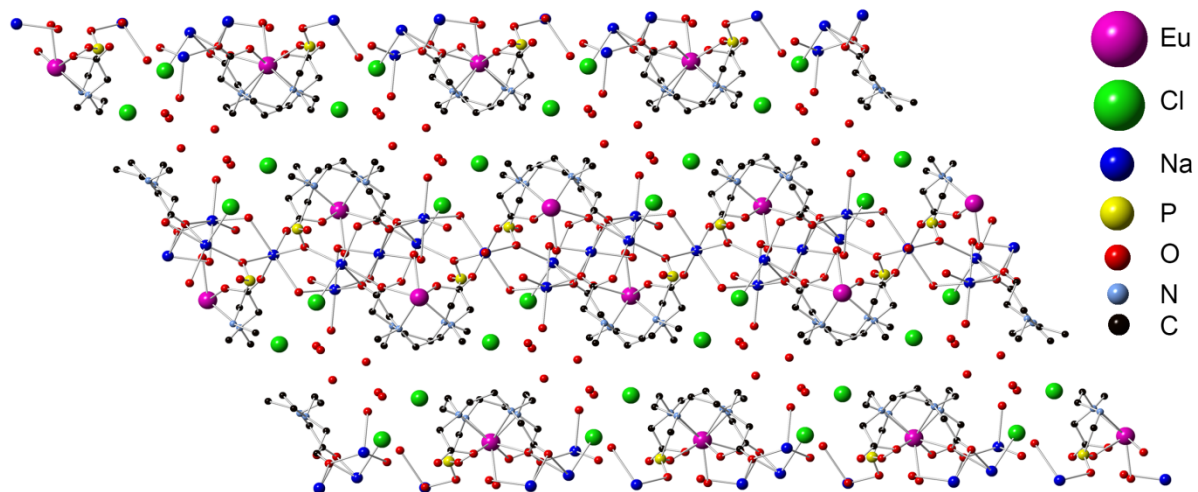

Figure S2. Crystal packing of Na[Eu(do3aP<sup>H</sup>)(H<sub>2</sub>O)]·2NaCl·7.125H<sub>2</sub>O. The view along the y-axis. Hydrogen atoms are omitted for clarity.

### Isolation and structure of DO3A lactame – $\text{H}_2\text{do3a}^{\text{lac}}$

When old batches of  $\text{H}_3\text{do3a}$  were used for synthesis of  $\text{H}_4\text{do3aP}^{\text{H}}$  (especially when stored in semi-solid form obtained by evaporation from acid media after deesterification), some amount of lactam  $\text{H}_2\text{do3a}^{\text{lac}}$  was isolated as a late fraction of the ion exchange workup of the reaction mixture. It is probably predominantly formed on pro-longed standing of  $\text{H}_3\text{do3a}$  under acid conditions (after evaporation in  $\text{CF}_3\text{COOH}$ ). Its  $^1\text{H}$  NMR spectra are rather complicated due to rigidity of the molecule and, thus, the X-ray diffraction study was performed to confirm identity of the compound (Figure S3).

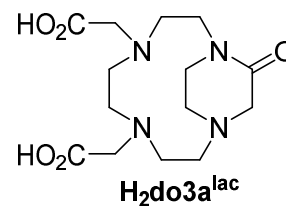

Single-crystals of  $(\text{H}_4\text{do3a}^{\text{lac}})\text{Cl}_2 \cdot 2\text{H}_2\text{O}$  were grown by vapour diffusion of THF into the solution of the  $\text{H}_4\text{do3a}^{\text{lac}}$  in 6 M aq. HCl. In the crystal structure of  $(\text{H}_4\text{do3a}^{\text{lac}})\text{Cl}_2 \cdot 2\text{H}_2\text{O}$ , no disorder was found. The thermal parameter of one water-belonging hydrogen atoms was kept using  $U_{\text{eq}}(\text{H}) = 1.2 U_{\text{eq}}(\text{O})$  as it became too large when freely refined.

The macrocycle of  $(\text{H}_4\text{do3a}^{\text{lac}})^{2+}$  fragment is diprotonated. One of the protons is bound to the amine atom of the lactam ring, and the other is localized on the opposite nitrogen atom bearing one of the carboxylate pendants and is involved in the medium-strong intramolecular hydrogen bond ( $d_{\text{N}\cdots\text{O}} = 2.88 \text{ \AA}$ ) to the lactam oxygen atom. Both carboxylic acid pendant arms are protonated and involved in intermolecular hydrogen bonding with water molecules of crystallization and chloride counter anions.

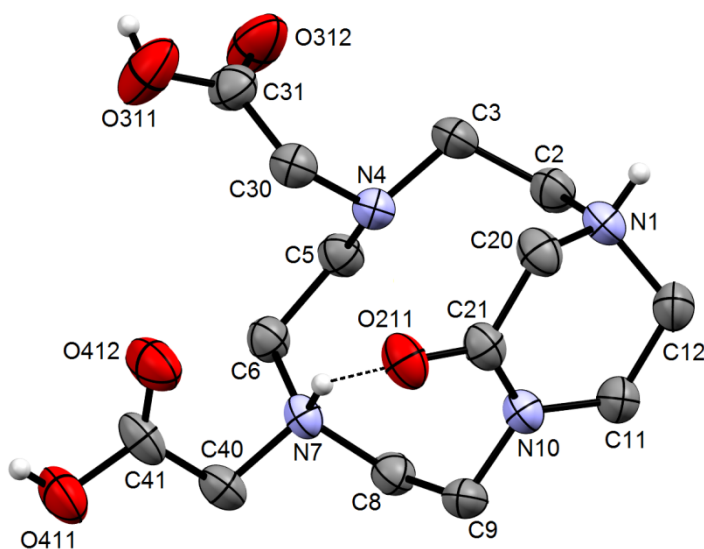

Figure S3. Molecular structure of  $(\text{H}_4\text{do3a}^{\text{lac}})^{2+}$  cation found in the crystal structure of  $(\text{H}_4\text{do3a}^{\text{lac}})\text{Cl}_2 \cdot 2\text{H}_2\text{O}$ . The intramolecular hydrogen bond is shown as a dashed line. Carbon-bound hydrogen atoms are omitted for clarity.

Table S1. Experimental data of the reported crystal structures.

| Compound                                                               | (H <sub>6</sub> do3aP <sup>H</sup> )Cl <sub>2</sub> ·THF·3H <sub>2</sub> O                    | Na[Eu(do3aP <sup>H</sup> )(H <sub>2</sub> O)]·2NaCl·7.125H <sub>2</sub> O                                                            | (H <sub>4</sub> do3a <sup>lam</sup> )Cl <sub>2</sub> ·2H <sub>2</sub> O       |
|------------------------------------------------------------------------|-----------------------------------------------------------------------------------------------|--------------------------------------------------------------------------------------------------------------------------------------|-------------------------------------------------------------------------------|
| Formula                                                                | C <sub>19</sub> H <sub>45</sub> N <sub>4</sub> O <sub>12</sub> P <sub>1</sub> Cl <sub>2</sub> | C <sub>15</sub> H <sub>41.25</sub> Cl <sub>2</sub> Eu <sub>1</sub> N <sub>4</sub> Na <sub>3</sub> O <sub>16.125</sub> P <sub>1</sub> | C <sub>14</sub> H <sub>30</sub> Cl <sub>2</sub> N <sub>4</sub> O <sub>7</sub> |
| <i>M<sub>r</sub></i>                                                   | 623.46                                                                                        | 858.57                                                                                                                               | 437.32                                                                        |
| Colour                                                                 | colourless                                                                                    | colourless                                                                                                                           | colourless                                                                    |
| Shape                                                                  | prism                                                                                         | needle                                                                                                                               | prism                                                                         |
| Dimensions (mm)                                                        | 0.30×0.25×0.20                                                                                | 0.15×0.08×0.05                                                                                                                       | 0.50×0.20×0.20                                                                |
| Crystal system                                                         | monoclinic                                                                                    | monoclinic                                                                                                                           | orthorhombic                                                                  |
| Space group                                                            | C2/c                                                                                          | C2/c                                                                                                                                 | P2 <sub>1</sub> 2 <sub>1</sub> 2 <sub>1</sub>                                 |
| <i>a</i> (Å)                                                           | 22.0543(3)                                                                                    | 32.1447(5)                                                                                                                           | 9.7430(4)                                                                     |
| <i>b</i> (Å)                                                           | 11.19790(10)                                                                                  | 9.43790(10)                                                                                                                          | 10.3130(5)                                                                    |
| <i>c</i> (Å)                                                           | 24.5815(4)                                                                                    | 23.5537(4)                                                                                                                           | 21.7340(10)                                                                   |
| α (°)                                                                  | 90                                                                                            | 90                                                                                                                                   | 90                                                                            |
| β (°)                                                                  | 96.4613(8)                                                                                    | 121.0061(8)                                                                                                                          | 90                                                                            |
| γ (°)                                                                  | 90                                                                                            | 90                                                                                                                                   | 90                                                                            |
| <i>V</i> (Å <sup>3</sup> )                                             | 6032.13(14)                                                                                   | 6124.65(16)                                                                                                                          | 2183.82(17)                                                                   |
| <i>Z</i>                                                               | 8                                                                                             | 8                                                                                                                                    | 4                                                                             |
| <i>D<sub>c</sub></i> (g cm <sup>-3</sup> )                             | 1.373                                                                                         | 1.862                                                                                                                                | 1.330                                                                         |
| μ (mm <sup>-1</sup> )                                                  | 0.329                                                                                         | 2.392                                                                                                                                | 0.337                                                                         |
| <i>F</i> (000)                                                         | 2656                                                                                          | 3466                                                                                                                                 | 928                                                                           |
| Reflections unique; observed ( <i>I</i> <sub>o</sub> > 2σ( <i>I</i> )) | 6889; 5601                                                                                    | 7035; 6005                                                                                                                           | 4220; 3435                                                                    |
| Parameters                                                             | 432                                                                                           | 451                                                                                                                                  | 276                                                                           |
| G-o-f on <i>F</i> <sup>2</sup>                                         | 1.078                                                                                         | 1.039                                                                                                                                | 1.066                                                                         |
| <i>R</i> ; <i>R'</i> (all data)                                        | 0.0466; 0.0650                                                                                | 0.0299; 0.0406                                                                                                                       | 0.0439; 0.0620                                                                |
| <i>wR</i> ; <i>wR'</i> (all data)                                      | 0.1291; 0.1449                                                                                | 0.0658; 0.0709                                                                                                                       | 0.0987; 0.1088                                                                |
| Difference max; min (e Å <sup>-3</sup> )                               | 0.474; -0.523                                                                                 | 1.941; -1.169                                                                                                                        | 0.321; -0.181                                                                 |

Table S2. Overall protonation constants  $\log\beta$  of ligands ( $I = 0.1 \text{ M NMe}_4\text{Cl}$ ,  $25 \text{ }^\circ\text{C}$ ).

|                  | $\text{H}_4\text{do3aP}^{\text{H}}$ | $\text{H}_5\text{do3aP}^{\text{PIN}}$ | $\text{H}_4\text{do3aP}^{\text{AM}}$ |
|------------------|-------------------------------------|---------------------------------------|--------------------------------------|
| HL               | 12.43(1)                            | 12.46(1)                              | 13.29(3)                             |
| H <sub>2</sub> L | 21.53(1)                            | 21.86(2)                              | 22.85(3)                             |
| H <sub>3</sub> L | 25.86(1)                            | 26.41(2)                              | 31.30(3)                             |
| H <sub>4</sub> L | 28.64(1)                            | 29.83(2)                              | 35.41(3)                             |
| H <sub>5</sub> L | 30.09(1)                            | 31.89(2)                              | 37.27(3)                             |
| H <sub>6</sub> L | –                                   | –                                     | 38.25(4)                             |

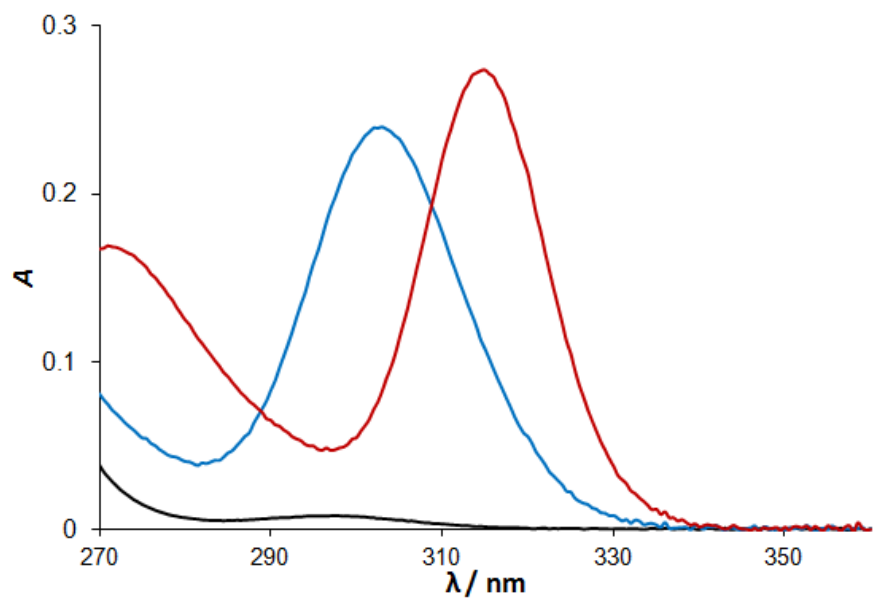

Figure S4. Representative absorption spectra:  $\text{Ce}^{\text{III}}$  aqua ion (black), *out-of-cage* (blue) and *in-cage* (red)  $\text{Ce}^{\text{III}}$ -do3aP<sup>PIN</sup> complex ( $c_{\text{M}} = c_{\text{L}} = 4.0 \cdot 10^{-4}$  M, 25 °C).

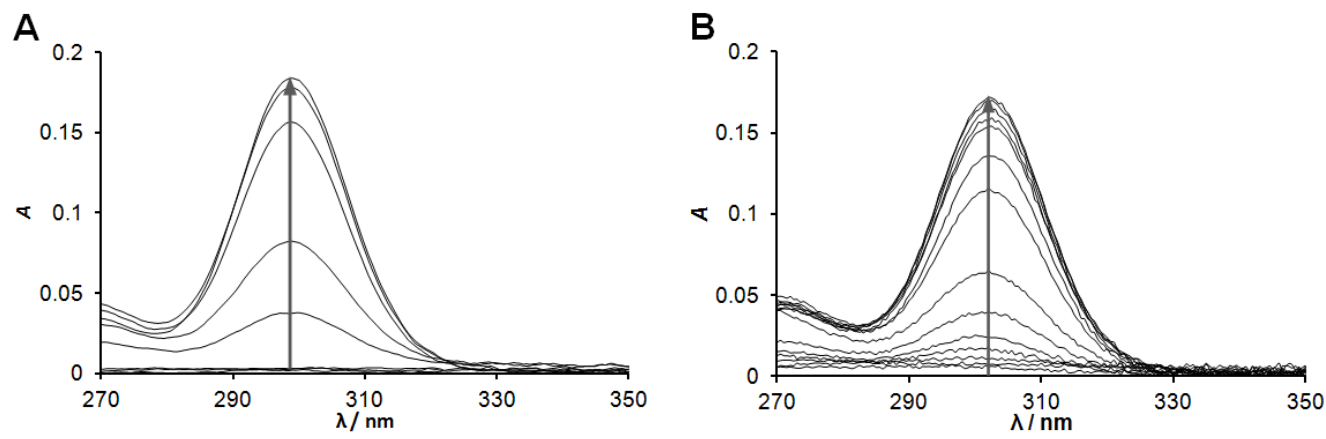

Figure S5. Representative absorption spectra of  $\text{Ce}^{\text{III}}$ -H<sub>4</sub>do3aP<sup>H</sup> (A, pH ~ 1–3) and  $\text{Ce}^{\text{III}}$ -H<sub>5</sub>do3aP<sup>PIN</sup> (B, pH ~ 0–3) systems measured immediately after mixing at various pH ( $c_{\text{M}} = c_{\text{L}} = 4.0 \cdot 10^{-4}$  M, 25 °C). The arrow indicates increasing pH. Changes of absorbance at absorption band maximum are shown in Figure S6.

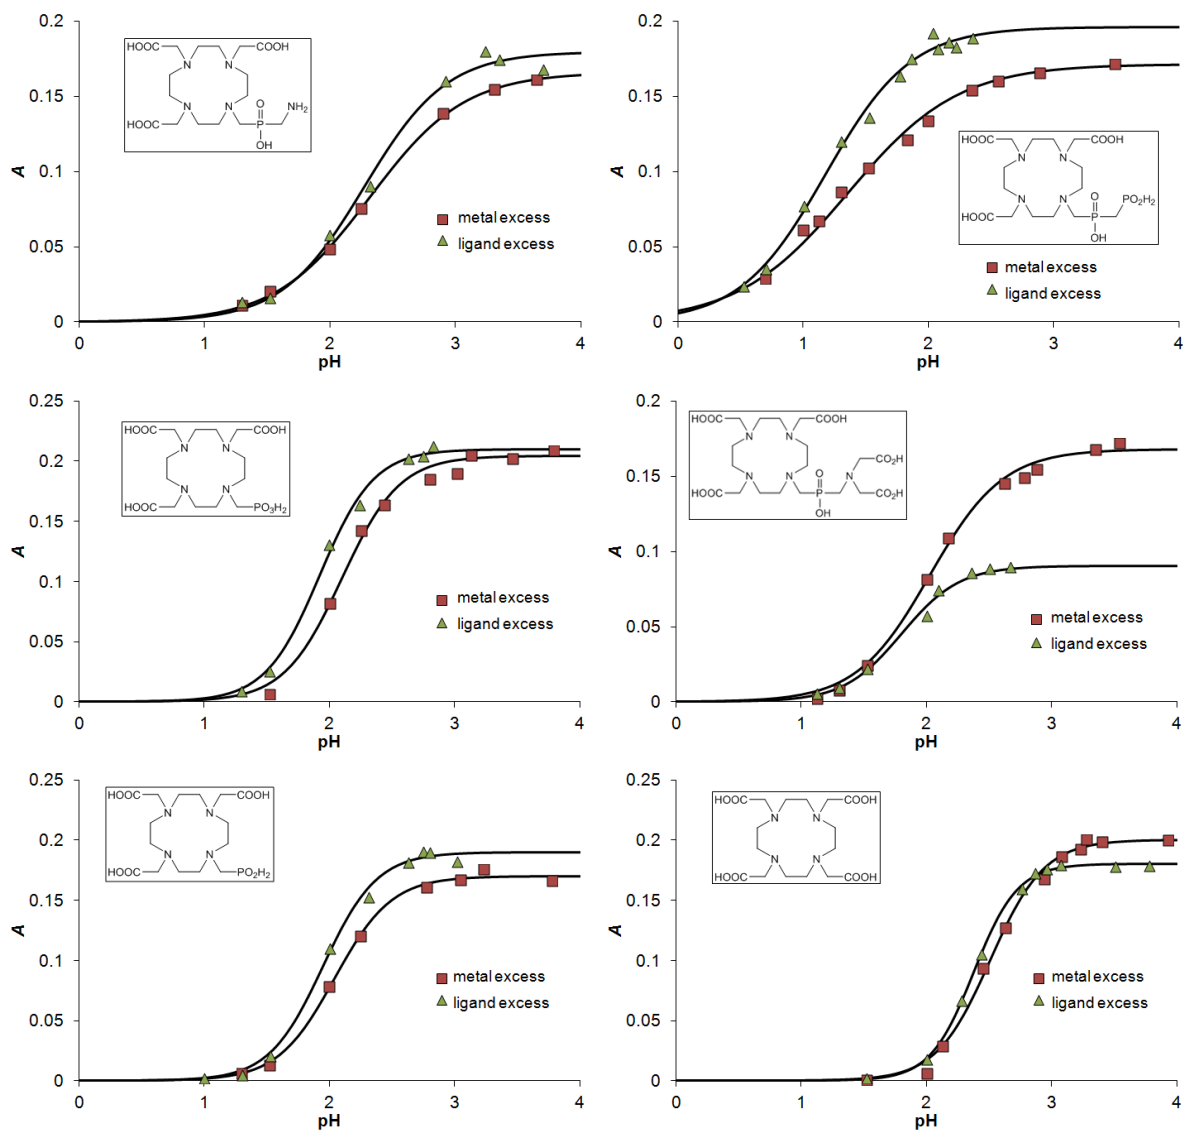

Figure S6. Formation of *out-of-cage* complexes: pH dependence of absorbance at absorption band maximum (298–305 nm) measured immediately after mixing of the components (25 °C) under the  $\text{Ce}^{\text{III}}$  excess ( $4.0 \cdot 10^{-3}$  M,  $c_{\text{L}} = 4.0 \cdot 10^{-4}$  M) and under the ligand excess ( $c_{\text{Ce}} = 4.0 \cdot 10^{-4}$  M,  $c_{\text{L}} = 4.0 \cdot 10^{-3}$  M). The lines correspond to the best fits according to Equation 2.



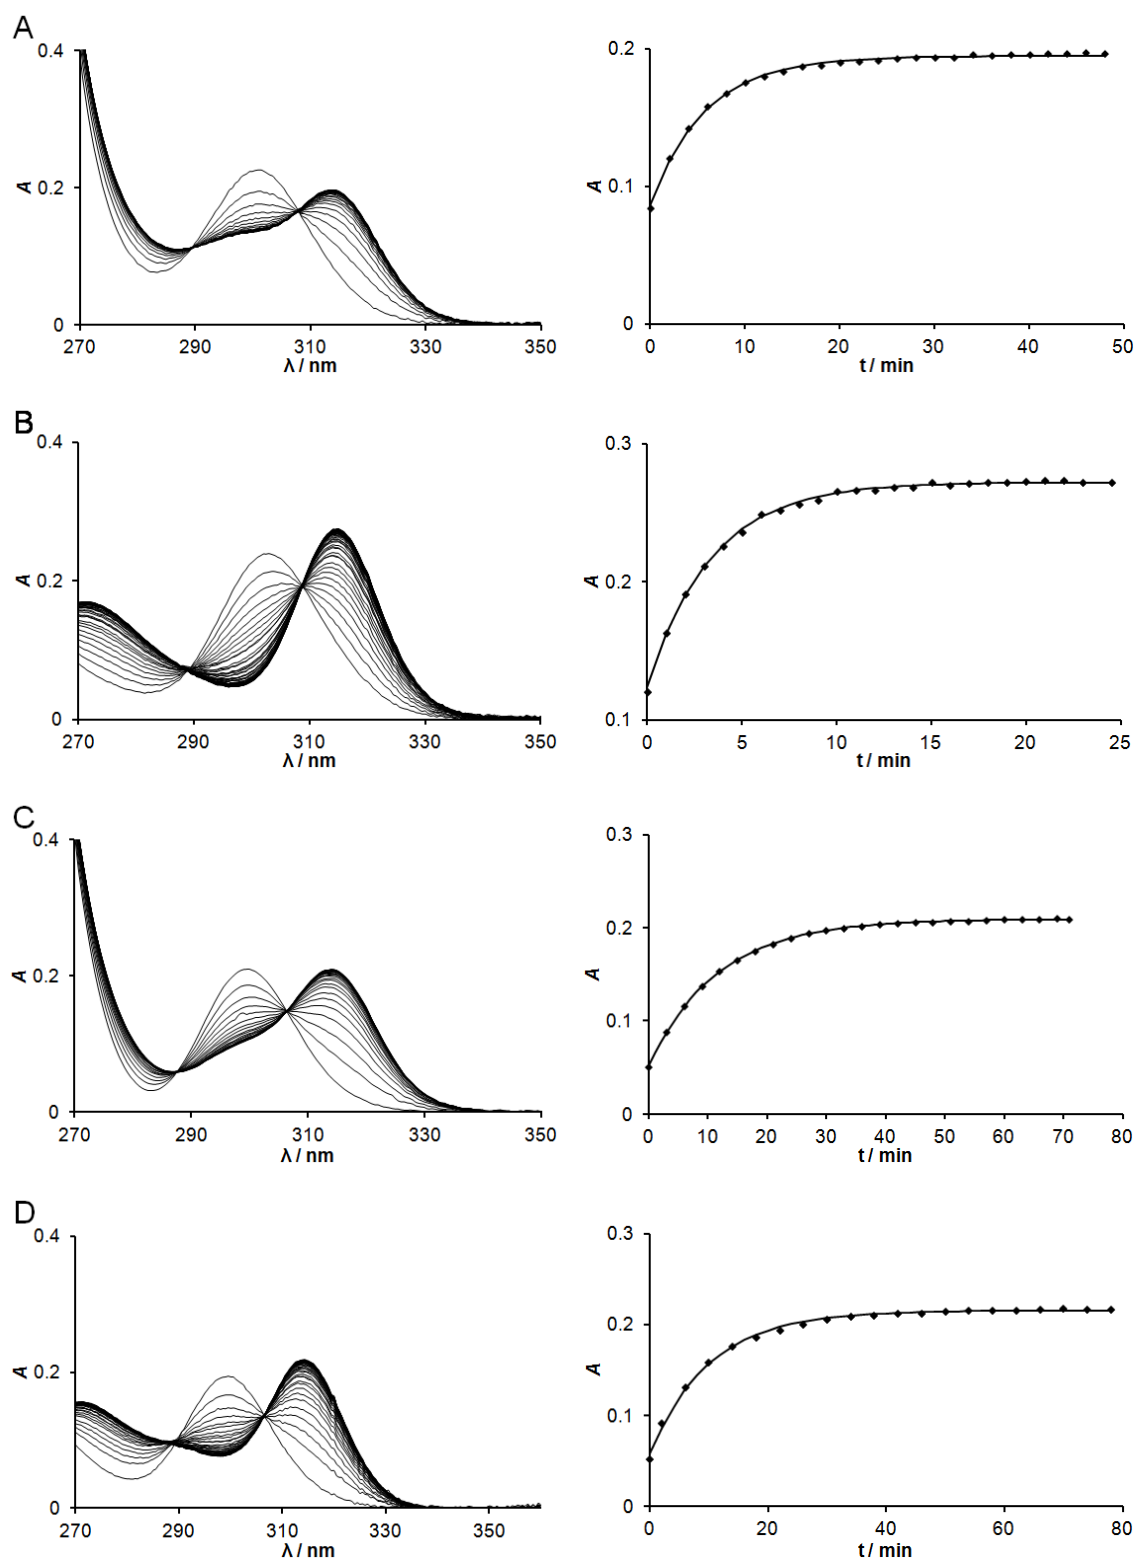

Figure S7. Changes of absorption spectra in the course of complexation of  $H_5do3aP^{PIN}$  and  $H_4do3aP^{AM}$  (left, 25 °C) and time dependences of absorbance at absorption band maximum (~ 315 nm) of the *in-cage* complex (right). The curves represent the best fit according to Equation 1. **A:**  $H_5do3aP^{PIN}$ ,  $c_{Ce} = 4.0 \cdot 10^{-4}$  M,  $c_L = 4.0 \cdot 10^{-3}$  M, pH = 5.4; **B:**  $H_5do3aP^{PIN}$ ,  $c_{Ce} = 4.0 \cdot 10^{-3}$  M,  $c_L = 4.0 \cdot 10^{-4}$  M, pH = 5.4; **C:**  $H_4do3aP^{AM}$ ,  $c_{Ce} = 4.0 \cdot 10^{-4}$  M,  $c_L = 4.0 \cdot 10^{-3}$  M, pH = 5.7; **D:**  $H_4do3aP^{AM}$ ,  $c_{Ce} = 4.0 \cdot 10^{-3}$  M,  $c_L = 4.0 \cdot 10^{-4}$  M, pH = 5.7.

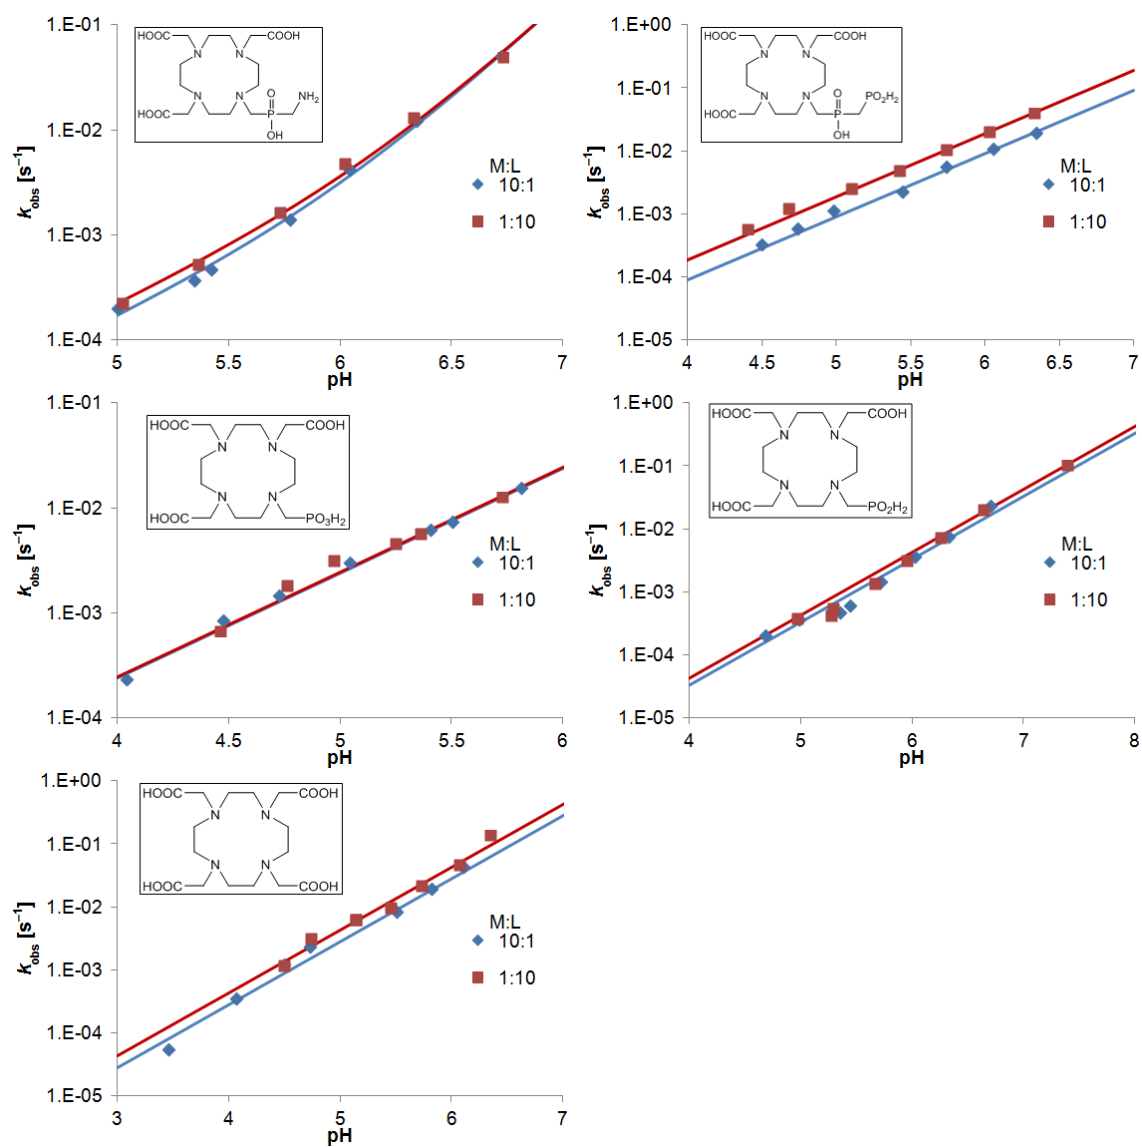

Figure S8. pH dependence of the formation rate constants (25 °C) under the Ce<sup>III</sup> excess ( $c_{\text{Ce}} = 4.0 \cdot 10^{-3}$  M,  $c_{\text{L}} = 4.0 \cdot 10^{-4}$  M, blue diamonds) and under the ligand excess ( $c_{\text{Ce}} = 4.0 \cdot 10^{-4}$  M,  $c_{\text{L}} = 4.0 \cdot 10^{-3}$  M, red squares). The lines correspond to the best fits according to Equation 3.
